# Supplementary material
Source: publisher figshare collection journal article supplement (https://acs.figshare.com/ndownloader/files/23392292)
Supplement: Supplementary file 1 [file 23392292]

---

# **Supporting information to the manuscript, Solvation Energy of Ions in Polymers: Effects of Chain Length and Connectivity on Saturated Dipoles near Ions**

Lijun Liu<sup>†</sup> and Issei Nakamura<sup>\*,‡</sup>

*State Key Laboratory of Polymer Physics and Chemistry, Changchun Institute of Applied  
Chemistry, Chinese Academy of Sciences, Changchun, Jilin 130022, China, and Department of  
Physics, Michigan Technological University, Houghton, Michigan 49931, United States*

E-mail: inakamur@mtu.edu

---

\*To whom correspondence should be addressed

<sup>†</sup>State Key Laboratory of Polymer Physics and Chemistry, Changchun Institute of Applied Chemistry, Chinese Academy of Sciences, Changchun, Jilin 130022, China

<sup>‡</sup>Department of Physics, Michigan Technological University, Houghton, Michigan 49931, United States

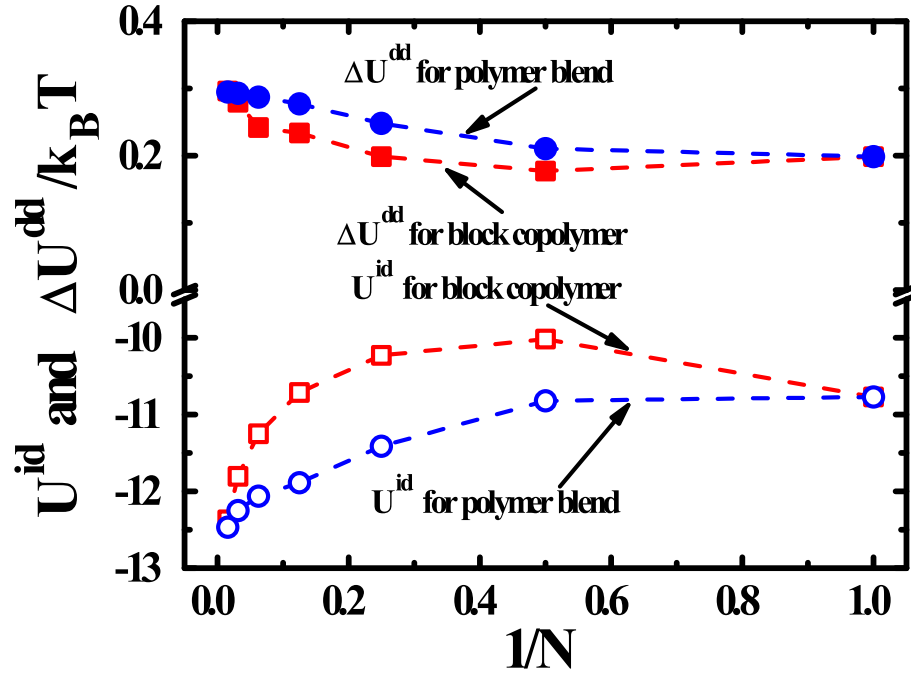

Figure S1: Dependence of the intermolecular interactions for the polymer blends and block copolymers on the chain length  $N$ . The total ion-dipole interaction  $U^{id}$  and the difference in the total dipole-dipole interaction between the pure and ion-containing liquids  $\Delta U^{dd}$ . The monomeric units of polymers A and B have the dipole moments with  $\mu_A = 0.3$  D and  $\mu_B = 0.5$  D. Colored symbols correspond to  $U^{id}$  for the polymer blends (blue empty circles) and the block copolymers (red empty squares), and  $\Delta U^{dd}$  for the polymer blends (blue filled circles) and block copolymers (red filled squares).

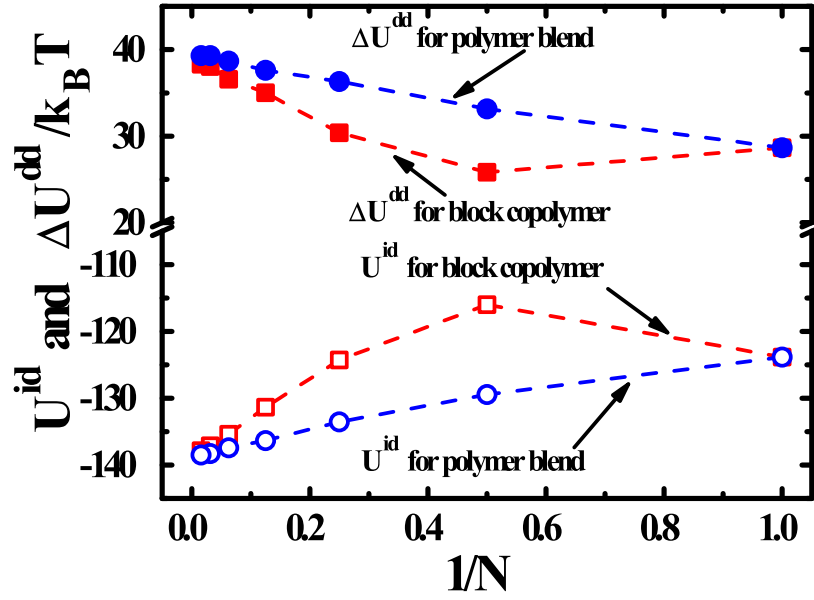

Figure S2: Dependence of the intermolecular interactions for the polymer blends and block copolymers on the chain length  $N$ . The total ion-dipole interaction  $U^{id}$  and the difference in the total dipole-dipole interaction between the pure and ion-containing liquids  $\Delta U^{dd}$ . The monomeric units of polymers A and B have the dipole moments with  $\mu_A = 1$  D and  $\mu_B = 2$  D. Colored symbols correspond to  $U^{id}$  for the polymer blends (blue empty circles) and the block copolymers (red empty squares), and  $\Delta U^{dd}$  for the polymer blends (blue filled circles) and block copolymers (red filled squares).

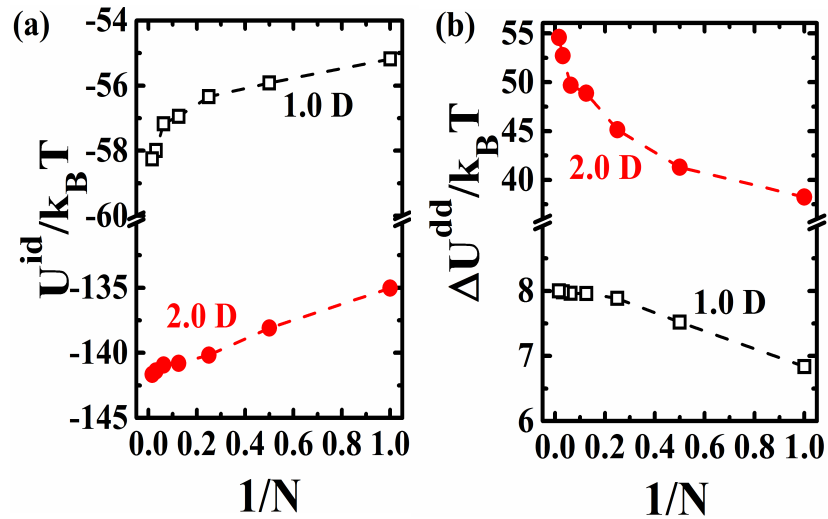

Figure S3: Dependence of the intermolecular interactions for the single-component polymers on the chain length  $N$ . (a) The total ion-dipole interaction  $U^{id}$  and (b) the difference in the total dipole-dipole interaction between the pure and ion-containing liquids  $\Delta U^{dd}$ . The dipole moments are  $\mu = 1$  D (black empty squares) and  $\mu = 2$  D (red filled circles).
